# Supplementary material
Source: MDPI journal article supplement (https://www.mdpi.com/1999-4907/15/5/771)
Supplement: s1 [file s1]

Supplementary File S1 Species composition and quantitative characteristics of main species in different forest layers

| Forest layer | Species                                           | Abbreviation | Relative density | Relative frequency | Relative dominance | Importance value |
|--------------|---------------------------------------------------|--------------|------------------|--------------------|--------------------|------------------|
| Tree layer   | <i>Picea asperata</i> Mast.                       | Pas          | 0.278            | 0.221              | 0.230              | 0.243            |
|              | <i>Larix principis-rupprechtii</i> Mayr.          | Lpr          | 0.176            | 0.201              | 0.288              | 0.222            |
|              | <i>Betula albosinensis</i> Burk.                  | Bal          | 0.191            | 0.154              | 0.122              | 0.156            |
|              | <i>Betula platyphylla</i> Suk.                    | Bpl          | 0.059            | 0.060              | 0.128              | 0.082            |
|              | <i>Sorbus pohuashanensis</i> (Hance) Hedl.        | Spo          | 0.080            | 0.114              | 0.041              | 0.078            |
|              | <i>Quercus wutaishanica</i> Mayr.                 | Qwu          | 0.068            | 0.081              | 0.039              | 0.062            |
|              | <i>Populus davidiana</i> Dode                     | Pda          | 0.056            | 0.047              | 0.057              | 0.053            |
| Shrub layer  | <i>Lonicera ferdinandii</i> Franch.               | Lfe          | 0.278            | 0.221              | 0.230              | 0.243            |
|              | <i>Cotoneaster acutifolius</i> Turcz.             | Cac          | 0.176            | 0.201              | 0.288              | 0.222            |
|              | <i>Rosa bella</i> Rehd.et Wils.                   | Rbe          | 0.191            | 0.154              | 0.122              | 0.156            |
|              | <i>Corylus mandshurica</i> Maxim.                 | Cma          | 0.059            | 0.060              | 0.128              | 0.082            |
|              | <i>Berberis amurensis</i> Rupr.                   | Bam          | 0.080            | 0.114              | 0.041              | 0.078            |
|              | <i>Lonicera hispidula</i> Pall.ex Roem.et Schult. | Lhi          | 0.068            | 0.081              | 0.039              | 0.062            |
|              | <i>Spiraea trilobata</i> L.                       | Str          | 0.056            | 0.047              | 0.057              | 0.053            |
|              | <i>Ribes mandchuricum</i> (Maxim.) Kom.           | Rma          | 0.040            | 0.054              | 0.047              | 0.047            |
|              | <i>Potentilla glabra</i> Lodd.                    | Pgl          | 0.025            | 0.020              | 0.015              | 0.020            |
|              | <i>Ribes burejense</i> Fr.Schmidt.                | Rbu          | 0.009            | 0.020              | 0.012              | 0.014            |
|              | <i>Cotoneaster multiflorus</i> Bge.               | Cmu          | 0.009            | 0.013              | 0.018              | 0.014            |
| Herb layer   | <i>Poa pratensis</i> L.                           | Ppr          | 0.140            | 0.082              | 0.316              | 0.179            |
|              | <i>Duchesnea indica</i> (Andrews.) Focke          | Din          | 0.211            | 0.051              | 0.172              | 0.144            |
|              | <i>Chimaphila japonica</i> Miq.                   | Cja          | 0.173            | 0.074              | 0.078              | 0.108            |
|              | <i>Adoxa moschatellina</i> L.                     | Amo          | 0.100            | 0.069              | 0.049              | 0.073            |
|              | <i>Myosotis alpestris</i> F. W. Schmidt           | Mal          | 0.062            | 0.072              | 0.035              | 0.056            |

|                                                |     |       |       |       |       |
|------------------------------------------------|-----|-------|-------|-------|-------|
| <i>Ligusticum jeholense</i> Nakai et Kitag.    | Lje | 0.065 | 0.028 | 0.035 | 0.043 |
| <i>Allium ramosum</i> L.                       | Ara | 0.024 | 0.033 | 0.052 | 0.036 |
| <i>Maianthemum bifolium</i> (L.) F. W. Schmidt | Mbi | 0.034 | 0.050 | 0.024 | 0.036 |
| <i>Galium bungei</i> Steud.                    | Gbu | 0.025 | 0.041 | 0.011 | 0.026 |
| <i>Anthriscus sylvestris</i> (L.) Hoffm.       | Asy | 0.027 | 0.028 | 0.021 | 0.025 |
| <i>Aquilegia yabeana</i> Kitag.                | Aya | 0.013 | 0.049 | 0.010 | 0.024 |
| <i>Sanicula giraldii</i> Wolf.                 | Sgi | 0.013 | 0.036 | 0.021 | 0.024 |
| <i>Phlomis umbrosa</i> Turcz.                  | Pum | 0.011 | 0.039 | 0.019 | 0.023 |
| <i>Euphorbia pekinensis</i> Rupr.              | Epe | 0.012 | 0.030 | 0.004 | 0.015 |
| <i>Agrimonia pilosa</i> Ldb.                   | Api | 0.007 | 0.028 | 0.004 | 0.013 |
| <i>Thalictrum petaloideum</i> L.               | Tpe | 0.004 | 0.027 | 0.003 | 0.011 |
