# Supplementary material
Source: MDPI journal article supplement (https://www.mdpi.com/1999-4907/15/5/771)
Supplement: s1 [file s1]

Supplementary File S2 Species diversity indices of different vegetation layers at three altitude gradients

| Vegetation layer | Altitude gradient/m | Plot /NO. | Simpson's dominance index | Shannon Diversity index | Margalef richness index | Pielou evenness index | Fisher's alpha |
|------------------|---------------------|-----------|---------------------------|-------------------------|-------------------------|-----------------------|----------------|
| Tree layer       | LA<br>(1850-1950)   | L1        | 0.38                      | 0.63                    | 0.55                    | 0.47                  | 0.68           |
|                  |                     | L2        | 0.33                      | 0.66                    | 0.95                    | 0.32                  | 1.17           |
|                  |                     | L3        | 0.47                      | 1.05                    | 1.32                    | 0.36                  | 1.67           |
|                  | MA<br>(1850-1950)   | M1        | 0.43                      | 0.80                    | 0.60                    | 0.56                  | 0.76           |
|                  |                     | M2        | 0.36                      | 0.69                    | 0.85                    | 0.40                  | 1.07           |
|                  |                     | M3        | 0.57                      | 1.11                    | 1.19                    | 0.43                  | 1.50           |
|                  | HA<br>(1850-1950)   | H1        | 0.42                      | 0.61                    | 0.21                    | 0.92                  | 0.34           |
|                  |                     | H2        | 0.39                      | 0.66                    | 0.40                    | 0.65                  | 0.53           |
|                  |                     | H3        | 0.37                      | 0.58                    | 0.40                    | 0.59                  | 0.53           |
| Shrub layer      | LA<br>(1850-1950)   | L1        | 0.80                      | 1.74                    | 1.78                    | 0.82                  | 2.93           |
|                  |                     | L2        | 0.78                      | 1.69                    | 1.64                    | 0.77                  | 2.49           |
|                  |                     | L3        | 0.82                      | 1.84                    | 1.72                    | 0.79                  | 2.50           |
|                  | MA<br>(1850-1950)   | M1        | 0.83                      | 1.91                    | 1.90                    | 0.85                  | 3.01           |
|                  |                     | M2        | 0.80                      | 1.76                    | 1.64                    | 0.83                  | 2.49           |
|                  |                     | M3        | 0.69                      | 1.47                    | 1.31                    | 0.72                  | 1.84           |
|                  | HA<br>(1850-1950)   | H1        | 0.56                      | 1.04                    | 1.04                    | 0.71                  | 1.59           |
|                  |                     | H2        | 0.69                      | 1.23                    | 0.84                    | 0.86                  | 1.16           |
|                  |                     | H3        | 0.63                      | 1.05                    | 0.68                    | 0.95                  | 1.00           |
| Herb layer       | LA<br>(1850-1950)   | L1        | 0.81                      | 2.16                    | 3.39                    | 0.31                  | 4.31           |
|                  |                     | L2        | 0.84                      | 2.22                    | 2.50                    | 0.44                  | 3.05           |
|                  |                     | L3        | 0.80                      | 2.05                    | 2.40                    | 0.39                  | 2.93           |
|                  | MA<br>(1850-1950)   | M1        | 0.81                      | 1.99                    | 1.67                    | 0.52                  | 1.97           |
|                  |                     | M2        | 0.83                      | 2.02                    | 1.72                    | 0.54                  | 2.04           |
|                  |                     | M3        | 0.85                      | 2.13                    | 1.81                    | 0.56                  | 2.15           |
|                  | HA<br>(1850-1950)   | H1        | 0.79                      | 2.06                    | 2.86                    | 0.88                  | 3.49           |
|                  |                     | H2        | 0.85                      | 2.36                    | 3.99                    | 0.60                  | 5.11           |
|                  |                     | H3        | 0.85                      | 2.28                    | 2.99                    | 0.53                  | 3.68           |
